# Supplementary material for: A simple but efficient strategy to enhance hydrostability of intensely fluorescent Mg-based coordination polymer (CP) via forming a composite of CP with hydrophobic PVDF
Source: Royal Society of Chemistry journal article supplement (doi:10.1039/c5dt04754d), 2016-01-01
Supplement: c5dt04754d1.pdf [file c5dt04754d1.pdf]

*Supporting Information for*

**A simple but efficient strategy to enhance hydrostability of intensely fluorescent Mg-based coordination polymer (CP) via forming composite of CP with hydrophobic PVDF**

Lu Zhai,<sup>a, b</sup> Wen-Wei Zhang,<sup>\*a</sup> Jing-Lin Zuo,<sup>a</sup> Xiao-Ming Ren<sup>\*b</sup>

*<sup>a</sup> State Key Laboratory of Coordination Chemistry, School of Chemistry and Chemical Engineering, Nanjing University, Nanjing 210093 P. R. China. E-mail: [wwzhang@nju.edu.cn](mailto:wwzhang@nju.edu.cn)*

*<sup>b</sup> State Key Laboratory of Materials-Oriented Chemical Engineering and College of Chemistry & Molecular Engineering, Nanjing Tech University, Nanjing 210009, P. R. China. E-mail: [xmren@njtech.edu.cn](mailto:xmren@njtech.edu.cn)*

**Table S1** Preparation of other **1@PVDF** composites

| No. | wt. %<br><b>1@PVDF</b> | CP <b>1</b><br>(mg) | PVDF<br>(mg) | Pressure<br>(MPa) | Temperature<br>(°C) |
|-----|------------------------|---------------------|--------------|-------------------|---------------------|
| 1   | <b>10</b>              | 10                  | 90           | 6                 | 190                 |
| 2   | <b>15</b>              | 15                  | 85           | 6                 | 190                 |
| 3   | <b>20</b>              | 20                  | 80           | 6                 | 190                 |
| 4   | <b>25</b>              | 25                  | 75           | 6                 | 190                 |
| 5   | <b>30</b>              | 30                  | 70           | 6                 | 190                 |

**Table S2** Selected bond lengths (Å) and angles (°) in **1**

| bond lengths |            |             |            |             |            |
|--------------|------------|-------------|------------|-------------|------------|
| Mg1–O1       | 2.0079(14) | Mg1–O3      | 2.0489(14) | Mg1–O5      | 2.0760(15) |
| Mg1–O4       | 2.1127(17) | Mg1–O2#3    | 2.1304(16) | Mg1–O2      | 2.1321(14) |
| bond angles  |            |             |            |             |            |
| O1–Mg1–O3    | 89.28(5)   | O1–Mg1–O5   | 170.90(6)  | O3–Mg1–O5   | 92.84(5)   |
| O1–Mg1–O4    | 86.40(7)   | O3–Mg1–O4   | 90.49(6)   | O4–Mg1–O5   | 84.73(7)   |
| O1–Mg1–O2#3  | 96.74(7)   | O3–Mg1–O2#3 | 89.32(5)   | O2#3–Mg1–O5 | 92.13(6)   |
| O4–Mg1–O2#3  | 176.85(6)  | O1–Mg1–O2   | 89.18(5)   | O3–Mg1–O2   | 177.72(6)  |
| O5–Mg1–O2    | 88.94(5)   | O4–Mg1–O2   | 91.08(5)   | O2–Mg1–O2#3 | 89.19(6)   |

symmetry codes: #3=–x, –y, –z

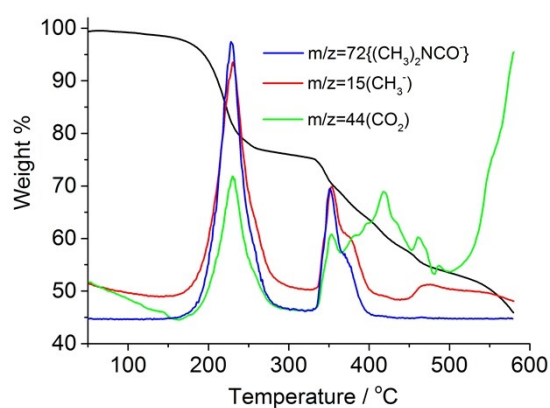**Fig. S1** TG–MS curves for **1**.

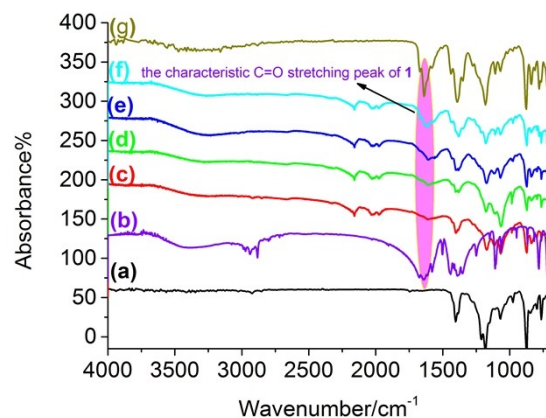

**Fig. S2** IR spectrum of (a) neat PVDF; (b) **1**; (c) 5 wt%; (d) 10 wt%; (e) 15 wt%; (f) 25 wt%; (g) 30 wt% **1**@PVDF respectively.

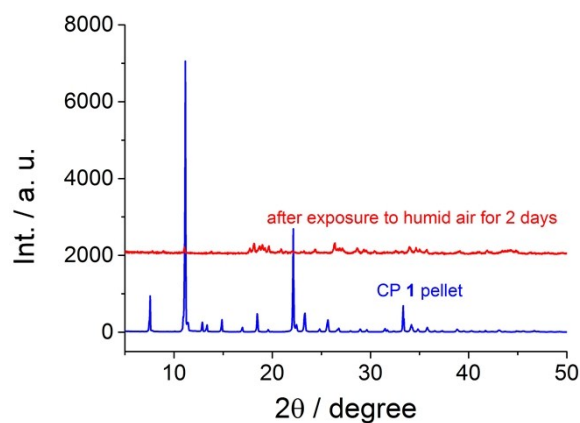

**Fig. S3** PXRD patterns of the samples of as-synthesized **1** pellet and that after exposure to humid air for 2 days.

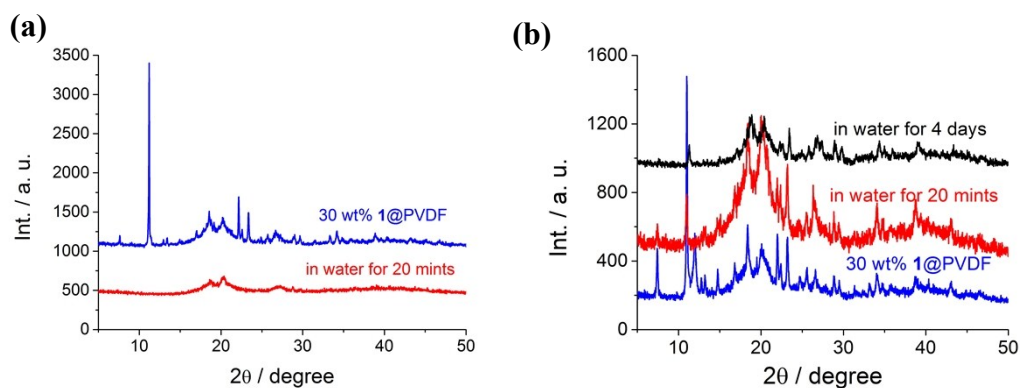

**Fig. S4** PXRD patterns of 30 wt% **1**@PVDF composite before and after immersed in water: (a) the sample was not annealed and (b) the sample was annealed at 190 °C.

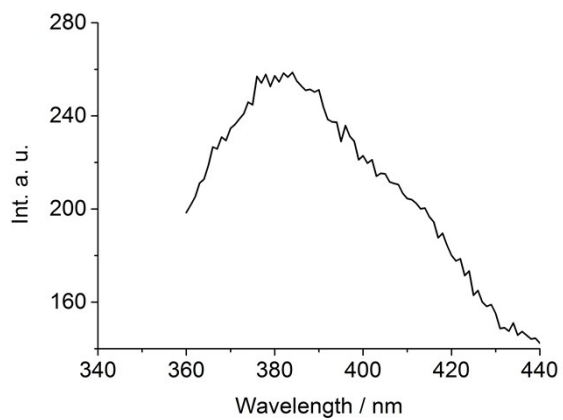

**Fig. S5** Emission spectrum of H<sub>3</sub>BTC in the solid state at room temperature.
